# Supplementary material
Source: Research Square preprint supplement (doi:10.21203/rs.3.rs-10109004/v1)
Supplement: Supplementary file 1 [file 76b206c832ffd3b5f8256076.docx]

# Graphic Abstract


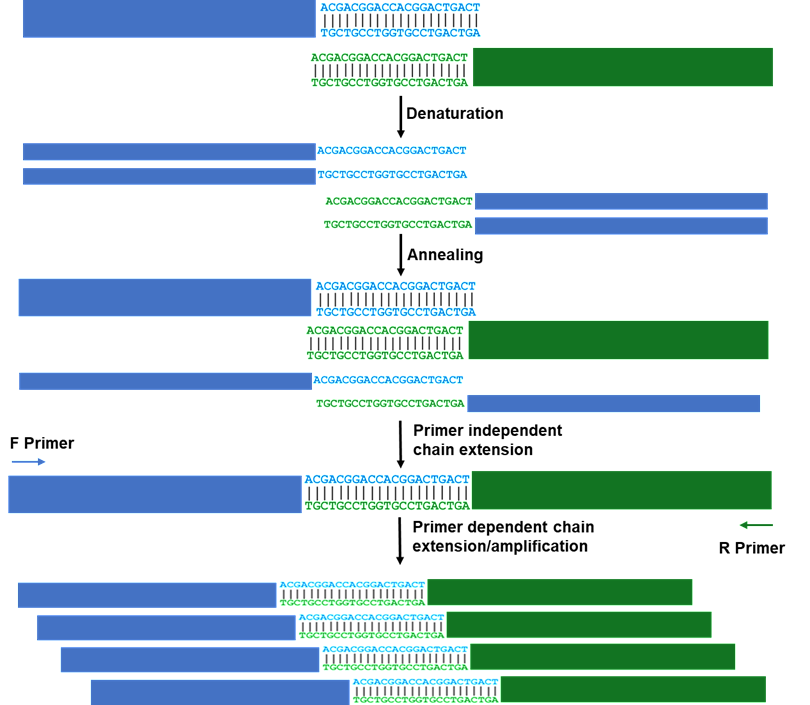

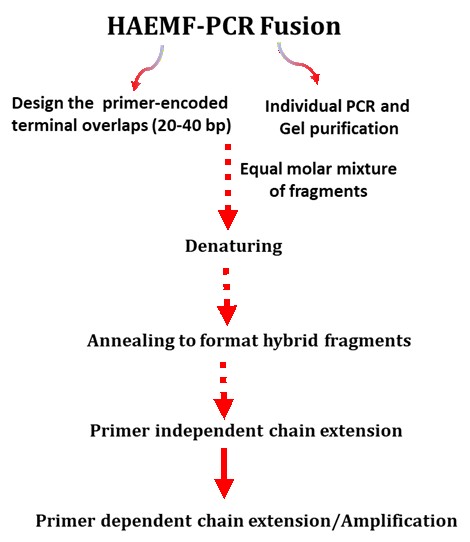


Homology-annealing extension-mediated fusion PCR (HAEMF-PCR) allows for the seamless assembly of multiple DNA fragments into a single amplicon using a single

DNA polymerase
