# Supplementary material
Source: Research Square preprint supplement (doi:10.21203/rs.3.rs-10109004/v1)
Supplement: Supplementary file 2 [file 81e36e613df382ec2016afdc.pdf]

## Supplementary Data

# A Protocol for Seamless and Simultaneous Fusion of Multiple DNA Fragments via Homology-Annealing Extension Mediated Fusion PCR (HAEMF-PCR)

by

*Xianyong Ma<sup>1\*</sup>, Jie Tang<sup>1</sup>, Yasin Oduk<sup>1,2</sup>, Charles X Ma<sup>3</sup>*

<sup>1</sup>: EpigenoMax Therapeutics LLC, 101 College Street, New Haven, CT 06510.

<sup>2</sup>: Nanomedigene LLC, 101 College Street, New Haven, CT 06510.

<sup>3</sup>: Nuvance Health Medical Practice, 34 Maple St. Norwalk, CT 06856

\*For correspondence: Xianyong Ma, Principal Investigator, EpigenoMax Therapeutics LLC, Suite 2#, BioLab, 101 College St, New Haven, CT 06510, USA. Email: xianyong.ma@epigenomax.com

## 1. Fragment sequences

Human TERT gene Promoter Sequence from (NCBI reference sequence NG\_009265.1):

**TTTCCTACTTGGCAGTACATCTACGTAACGGCATTTCGTGGTGCCCGGAGCCCGACGCCCCGCGT  
CCGGACCTGGAGGCAGCCCTGGGTCTCCGGATCAGGCCAGCGGCCAAAGGGTCGCCGCACGCAC  
CTGTTCCAGGGCCTCCACATCATGGCCCTCCCTCGGGTTACCCACAGCCTAGGCCGATTTCG  
ACCTCTCTCCGCTGGGGCCCTCGCTGGCGTCCCTGCACCCTGGGAGCGCGAGCGGGCGCGGGG  
GGGAAGCGCGGCCAGACCCCCGGGTCCGCCCGGAGCAGCTGCGCTGTCGGGGCCAGGCCGGG  
CTCCAGTGGATTTCGCGGGCACAGACGCCAGGACCGCGCTTCCACGTGGCGGAGGGACTGGG  
GACCCGGGCACCCGTCTGCCCTTACCTTCCAGCTCCGCTCCTCCGCGCGGACCCCGCCCC  
GTCCCGAC**

NSP4 (nonstructural protein 4, partial, synthetic sequence)

**AGAGAGTTGCCCGTACTTGACAGCGCAGCGTTCAATGTTGAGTGTTTCAAGAAGTTCGCTTGTA  
ATCAGGAATACTGGAAGACATTC AAGGAGAATCCATTAGACTGACCACTGAGAACGTGACGAA  
CTACATCACGAAGTTGAAAGGGCCTGAAGCAGCCGCATTCTTTGCG**

SGP promoter+51 nt cis element

**AGAGGACCTGTTATACACCTCTACGGCGGTCTAGATTGGTGCGTTAATACACAGAATTCTGAT  
TATAGCGCACTATTATAGCACC**

miniCMV:

**GGTAGGCGTGACGGTGGGAGGCCTATATAAGCAGAGCT**

Synthetic PLA2: UniProtKB/Swiss-Prot: Q9PVF1.1

**ATGGCACGAACCCTGTGGATACTGGCCGTGCTGCTGGTGGGCGTAGAAGGATCTCTGGTGCAAT  
TTGAGACCATGATCATGAAACTCGCCAAAAGGTCTGGCTTCTTCTGGTACTCTTTCTATGGTTG  
TTATTGTGGTTGGGGCGGGCATGGACTGCCACAGGATCCTACAGATCGGTGTTGCTTCGTGCAC  
GATTGTTGCTACGGCAAGGTCACCAACTGTAACCCTAAAACAGCTACATACTCCTACACAGAGG  
AGAATGACGGGATTGTGTGTGGGGGTGATGATCCATGCAAAAACAGGTCTGCGAATGTGATCG  
AGTGGCAGCCATGTGTTTCCGAGACAACAAGACACTTACGACGGCGATAAGTATTGGAAACTG  
CCTCCTCAGAAGTGTGAGGAAGATCCTGAGCCATGTAGACCCCCCTCCTCCACCCAAT**

Synthetic SVMP: UniProtKB/Swiss-Prot: [U5PZ28.1](#)

**ATGATCCAGGTACTGCTGGTGACCATCTGCCTCGCCGCACTGCCATAACCAGGGGAGCAGCATCA  
TTCTGGAGAGCGGCAACGTGAACGACTACGAGGTGGTGTACCCCCGGAAGGTGACGGCTCTGCC  
CAAGGGCGCCGGCCAGCCCAAGTACGAGGACGCCATGCAGTACGAGTTC AAGTGAACGGCGAG  
CCTGTGGTGTGCACCTGGAGAAGAACAAGGGACTGTTTAGTAAGGACTACTCCGAAACTCACT  
ACTCCAGCGACGGGCGGAAAATCACAATAACCCCCCTGTGGAGGATCACTGCTACTACCACGG**

GAGGATCGAGAATGACGCCGACTCTACTGGGTCCATCTCTGCCTGTAATGGCCTAAAGGGACAC  
TTCAAGCTGCAGGGGGAGATGTATCTGATCGAGCCACTGAAACTGAGTGACAGCGAGGCCCATG  
CCATCTACAAGTACGAGAACGTGGAAAAAGAAGACGAGGCCCTAAAATGTGTGGCGTGACCGA  
GACCAACTGGGAAAGCTACGAGCCTATTA AAAAGGCTAGCCAGAGCAACCTGACCCCCGAACAG  
CAGAGGTTCAACCCCTTTAAGTACGTGGAGCTGGTGTATCGTGGCCGATCACAGGATGTTCACTA  
AATATAATGGGGATCTGGAAAAGATCAGGATTA AAAATCTACGAGATCGTGAACATCCTGAACGA  
GATGTTT CAGGTATCTGTACATCAGGATCGCCCTGGTGGATCTCGAGATCTGGAGCAACCGCGAC  
CTGATAAACGTGACCTCCGTGGCCGGCGACACCCTCGACTCATTCGGCAATTGGCGAGAAACCG  
ACCTGCTCAAACGGAAAAGTCACGACAACGCACAGCTGCTGACAGGCATCGATTTCAACGGCAC  
CACTATCGGAATTGCCTATATAGCCAGTATGTGCAATCCATACCTGTCCGTCCGCATCGTGCAG  
GACCACTCCGAGATCAACTTTCTGATCGCTGTGACAATGGCCACGAAATGGGCCATAACCTGG  
GAATGCGCCACGACACCGACTACTGTACATGTGGGGGCTACAGCTGCATTATGTGCGCCGTGCT  
GTCTGATCAGCCTTCTAAGTTTTTCTCCA ACTGCTCCTACATTCAGTATGGCAAGTTCATCATG  
AACCAGAACTCCAGTGCATTCTGAACGAGCCCCTGGGCACCGATATCGTGTCTCCTCCCGTGT  
GTGGGAACGAAATCTGGAAGTGGGGGAAGAGTGC GATTGTGGCTGTCTACCAATTGCCAGGA  
TCCTTGCTGCAACGCCGCCACATGTAAGCAGTACTCCTGGGTGCAGTGC GAAAGCGGGGAGTGC  
TGCGAGCAGTGTAGGTTCCGGGCCGCTGGCACAGTGTGCAGACGGGCCACTGACAACGACATGG  
ACAACAGGTGTACAGGACAGAGCGCCGATTGCCCTTCAAATGGAAGACCCCCCTTCTCCACC  
CAAT

Synthetic SVSP: UniProtKB/Swiss-Prot: [Q9PTU8.1](#)

ATGGTGCTGATTAGAGTGATTGCAAACCTGCTCATCCTGCAGCTGTCCAACGCCCAGAAGTCCT  
CCGAGCTGGTGTATCGGCGGCGATGAATGTAACATCACCGAACACAGATTTCTGGTGGAGATCTT  
CAACTCCAGTGGGCTGTTTTGCGGCGGGACCCTGATCGACCAGGAGTGGGTGCTGAGCGCCGCC  
CACTGCGACATGAGAAATATGAGAATCTACCTGGGCGTGCACAATGAGGGCGTGCAGCACGCAG  
ACCAGCAGAGAAGTTTTGCCAGGGAGAAATTTTTCTGCCTGAGTAGCAGGAACTACACTAAATG  
GGACAAGGACATTATGCTGATCAGACTGAATCGGCCAGTCAACAACAGCGAACACATCGCCCCA  
CTGTCCCTGCCCAGCAACCCTCCCAGCGTTGGCTCCGTCTGTAGAATCATGGGCTGGGGCACAA  
TCACAAGCCCCAACGCTACATTTCCAGATGTGCCCCACTGCGCCAACATCAACCTGTTTAATTA  
CACCGTCTGCAGAGGCGCTCATGCAGGGCTGCCTGCCACCAGCAGGACCCTGTGTGCCGGCGTG  
CTGCAAGGCGGGATCGACACTTGTGGCGGCGACTCTGGCGGGCCCCTGATCTGCAATGGGACCT  
TCCAGGGCATCGTGTCTTGGGGGGGCCACCCCTGCGCCCAGCCTGGCGAGCCCGCTCTGTATAC  
CAAAGTGTTTGATTACCTGCCTTGGATCCAGTCCATCATCGCTGGCAACACAACAGCCACCTGC  
CCCCCGGACCTCTTGGGCTGGCT

## 2. Primers used in the Paper

| Table 1. Primers Used in the Paper |                                                                     |                |                                                   |
|------------------------------------|---------------------------------------------------------------------|----------------|---------------------------------------------------|
| Name                               | Sequence (5'-3')                                                    | Overlap Length | Description                                       |
| F01f                               | TTGGCAGTACATCTACGTAACGGCATTCTGGTGCCCGGAGCCCG CA202                  |                | Forward primer for F1 fragment with Sna BI        |
| F01r                               | ACAGGGTTCGTGCCATGGTGCGGGTGCTATAATAG                                 | 20 bp          | Reverse primer for F1 fragment                    |
| F01r-25                            | GCACGGCCAGTATCCACAGGGTTCGTGCCATGGTGCGGGTGCTATAATAG                  | 25 bp          | Reverse primer for F1 fragment (adjusted)         |
| F02f                               | CACCATGGCACGAACCCTGTGGATACTGGCCGTGC                                 | 25 bp          | Forward primer for F2 fragment                    |
| F02r-25                            | AGGTCAGCAGGCTTCCCCTTCTTCATTGGGTGGAGGAAGGGGGGGTCTAC                  | 25 bp          | Reverse primer for F2 fragment                    |
| F02r                               | CCCTTCTTATTGGGTGGAGGAAGGGGGGGTCTACATGGCTCAGGATCTTCTGACAC            | 20 bp          | Reverse primer for F2 fragment                    |
| F03f-25                            | GAAGGAAGGGGAAGCCTGCTGACCT                                           | 25 bp          | Forward primer for F3 fragment                    |
| F03f                               | TCCACCAATGAAGGAAGGGGAAGCCTGCTGACCT                                  | 20 bp          | Forward primer for F3 fragment                    |
| F03r-25                            | GCTTGAGCAGGGAGAAGTTGGTGGCATTGGTGGAGG GGGGGTCTTCC                    | 25 bp          | Reverse primer for F3 fragment                    |
| F04f-25                            | GCCACCAACTTCCCTGCTCAAGC                                             | 25 bp          | Forward primer for fragment 4 amplification       |
| F04r                               | TTAAGCCAGCCCAAGAGGTCCGGGG                                           |                | Reverse Primer for For fragment 4 amplification   |
| F04r-2                             | GAAAAAAGCTTGAATTGTTTTT AAGCCAGCCCAAGAGGTCCGGGGGGGCAGGTGGCTGTT GTGTT |                | Reverse Primer for For fragment 4 amplification   |
|                                    |                                                                     |                |                                                   |
| F1f-003-N                          | CTACGTAACGCGTCGGCATTCTGGTGCCCGGAGCCCGACGCCCGCTCCGGACC               |                | Forward Primer for CA401 fragment1 with MluI site |
| F1r-003                            | CCATGGTGGCAGCTCTGCTTATATAGGCCTCCAC                                  | 20 bp          | Reverse Primer for CA401 F1 fragment              |
| F2f(Tai)-003                       | AAGCAGAGCTGCCACCATGGCTTCTTGCT                                       | 20 bp          | Forward Primer for CA401 fragment2                |
| F2r-004-3                          | AGCAGGCTTCCCCTTCTCGCTGCCCGCCGCCAGACCCGCCCGCC                        | 25 bp          | Reverse Primer for CA401 F2 fragment              |
| F3f-004                            | GCAGCGAAGGAAGGGGAAGCCTGCTGACCTGC                                    | 25 bp          | Forward Primer for CA401 F3 fragment              |
| F3r-003                            | GAAAAAAGCTTGAATTGTTTTAACTTAAGCCAGCCCAAGAGG                          |                | Reverse Primer for CA401 plasmid with PmeI site   |

### 3. Efficacy Predication for HAEMF-PCR efficiency

| Numer of fusion fragments | 10 HAEMF-PCR cycles | 15 HAEMF-PCR cycles |
|---------------------------|---------------------|---------------------|
| 2                         | 65.13%              | 79.50%              |
| 3                         | 12.80%              | 18.40%              |
| 4                         | 2%                  | 3.00%               |
| 5                         | 0.32%               | 0.48%               |
| 6                         | 0.05%               | 0.08%               |

| Number of Cycles | 2 fragments | 3 fragments | 4 fragments | 5 fragments | 6 fragments |
|------------------|-------------|-------------|-------------|-------------|-------------|
| 5                | 41.00%      | 6.50%       | 1.02%       | 0.80%       | 0.03%       |
| 10               | 65.10%      | 12.80%      | 2.06%       | 1.60%       | 0.05%       |
| 15               | 79.50%      | 18.40%      | 3.11%       | 2.30%       | 0.08%       |

### 4. Plasmid Sequences used in the paper:

#### Ep-CA201

aaacaattcaagcttttttcaattctcgacctcgagacaaatggcagatattcatccacaatttttaaagaaaagggg  
 ggattgggggggtacagtgacaggggaaagaatagtagacataatagcaacagacatacaaaactaaagaattacaaaa  
 caaattacaaaaattcaaaattttcgggtttattacagggacagcagagatccagtttggccgcggtcgaggggt  
 tggggttgctgcttttccaaggcagccctgggtttgctgagggacgagggctgctctgggctggttccgggaaacgc  
 agcggcgccgaccctgggtctcgacattcttcaagtcggttcgagcgtcaccgggatcttccgctacccttgt  
 gggcccccgagcagcttctgctccgccccctaagtcgggaaggttcccttgcggttcgagggctgagggacgtgac  
 aaacggaagccgacgtctcactagtagccctcgacagcggacagcggcaggagcaatggcagcgcgaccgacgga  
 tgggctgtggccaatagcggctgctcagcagggcgccgagagcagcggcgggaagggcggtgagggagggcggg  
 gtgtggggcggttagtggtggccctgttccctgcccgcgaggtgttccgattctgcaagcctccggagcgcacgtcgg  
 cagtcggctccctcgttgaccgaatcaccgacctctctccccagggggatccaccggagcttaccatgggatcggcc  
 attgaacaagatggattgcacgcaggttctccggccgcttgggtggagaggctattcggctatgactgggcacaaca  
 gacaatcggtgctctgatgcccgcgtgttccggctgtcagcgcagggggcggcgggttcttttgtcaagaccgacc  
 tgtccgggtgcccgaatgaactgcaggacgagggcagcggctatcgtggctggccacgacggggcgttcccttgcgca  
 gctgtgctcgacgttctcactgaagcgggaagggactggctgctattgggcaagtgcggggcaggatctcctgtc  
 atctcaccttctcctgcccagaaaagtatccatcatggctgatgcaatgcccggctgcatacgttctgatccggcta

cctgcccattcgaccaccaagcgaaacatcgcatcgagcgcagcactcgatggaagccggctctgtcgatcag  
gatgatctggacgaagagcatcaggggctcgccgacccgaactgttcgcccaggctcaaggcgcgcgatgcccgcgg  
cgatgatctcgtcgtgacccatggcgatgcctgcttgccgaatatcatgggtgaaaaatggccgcttttctggattca  
tcgactgtggccggctgggtgtggcgaccgctatcaggacatagcgttggctaccgctgatattgctgaagagctt  
ggcggcgaatgggctgaccgcttcctcgtgctttacgggtatcgccgctcccgattcgcagcgcacgccttctatcg  
ccttcttgacgagttcttctgacgccccccccacgacccgcagcgcgccgacccgaaaggagcgcacgacccccatgcat  
cgttaagagctcggtagcctttaagaccaatgacttacaaggcagctgtagatcttagccactttttaaaagaaaagg  
ggggactggaagggctaattcactcccaacgaagacaagatctgctttttgcttgtactgggtctctctggttagac  
cagatctgagcctgggagctctctggctaactagggaaaccactgcttaagcctcaataaagcttgcccttgagtgt  
tcaagtagtgtgtgcccgtctgttgtgtgactctggtaactagagatccctcagacccttttagtcagtgtgaaaa  
tctctagcagtagtagttcatgtcatcttattattcagtatttataacttgcaaagaaatgaatatcagagagtgag  
aggaaacttgtttattgacgcttataatgggttacaataaagcaatagcatcacaatttcacaataaagcattttt  
ttcactgcattctagttgtggtttgtccaaactcatcaatgtatcttatcatgtctggctctagctatcccgccct  
aactccgcccatcccgccctaactccgccagttccgccattctccgcccatggctgactaatttttttttattt  
atgcagagggccgaggccgctcggcctctgagctattccagaagtagtgaggaggcttttttggaggcctagggacg  
tacccaattcgccctatagtgagtcgtattacgcgcgctcactggccgctcgttttacaacgctcgtgactgggaaaac  
cctggcgttacccaacttaatcgcttgcagcacatcccccttccgccagctggcgtaatagcgaagagggccgcac  
cgatcgcccttcccaacagttgcgagcctgaatggcgaatgggacgcgccctgtagcggcgcattaagcgcggcgg  
gtgtggtggttacgcgcagcgtgaccgctacacttgccagcgcctagcgcgccctcctttcgttttctccctcc  
tttctcgccacgttcgcggctttccccgtcaagctctaaatcgggggctccctttagggttccgatttagtgcttt  
acggcacctcgacccccaaaaaacttgattaggggtgatgggttcacgtagtgggcatcgccctgatagacgggttttc  
gccctttgacggttgagtcacggttctttaatagtggaactctgttccaaactggaacaacactcaaccctatctcg  
gtctattcttttgattataagggattttgccgatttccgctattgggttaaaaaatgagctgatttaaaaaatt  
taacgcgaattttaaaaaatattaacgcttacaatttaggtggcacttttcggggaatgtgcgcggaaccctat  
ttgtttatttttctaaatacattcaaatatgtatccgctcatgagacaataaccctgataaatgcttcaataatatt  
gaaaaaggaagagtatgagtattcaacatttccgtgtcgccttattcccttttttgcggcattttgccttcctggt  
tttgctcaccagaaacgctgggtgaaagttaaagatgctgaagatcagttgggtgcacgagtggttacatcgaact  
ggatctcaacagcggtaagatccttgagagttttcgccccgaagaacgttttccaatgatgagcacttttaaagtcc  
tgctatgtggcgcggtattatcccgtattgacgcccggcaagagcaactcggctcgcgcatacactattctcagaat  
gacttggttgagtactcaccagtcacagaaaagcatcttacggatggcatgacagtaagagaattatgcagtgctgc  
cataaccatgagtgataaacactgcccgaacttacttctgacaacgatcggaggaccgaaggagctaaccgcttttt  
tgcacaacatgggggatcatgtaactcgcttgatcgttgggaaccggagctgaatgaagccataccaaacgacgag  
cgtgacaccacgatgcctgtagcaatggcaacaacgttgcgcaaaactattaactggcgaactacttactctagcttc  
ccggcaacaattaatagactggatggaggcggataaagttgcaggaccacttctgcgctcggcccttccggctggct  
ggtttattgtgataaatctggagccggtgagcgtgggtctcgcggtatcattgcagcactggggccagatggtaag  
ccctcccgtatcgtagtattctacacgacggggagtcaggcaactatggatgaacgaaatagacagatcgctgagat  
aggtgcctcactgattaagcattggtaactgtcagaccaagtttactcatatatactttagattgattaaaacttc  
atttttaatttaaaaggatctaggtgaagatcctttttgataatctcatgacccaaaatcccttaacgtaggttttcg  
ttccactgagcgtcagaccccgtagaaaagatcaaaggatcttcttgagatccttttttctgcgcgtaatctgctg  
cttgcaaacaaaaaaaccaccgctaccagcgggtggtttggtttgcgggatcaagagctaccaactcttttccgaagg  
taactggcttcagcagagcgcagataccaaataactgttcttctagtgtagccgtagttaggccaccacttcaagaac  
tctgtagcaccgcctacatacctcgctctgctaactcctggttaccagtggtgctgcccagtgggcgataagtcgtgtct  
taccgggttggactcaagacgatagttaccggataaggcgcagcggctcgggctgaacgggggggttcgtgcacacagc  
ccagcttggagcgaacgacctacaccgaactgagatacctacagcgtgagctatgagaaagcggccacgcttcccga  
gggagaaaggcggacaggtatccggtaagcggcagggctcggaacaggagagcgcagagggagcttccagggggaaa  
cgcctggatctttatagtcctgtcgggtttccgccacctctgacttgagcgtcgatttttgtgatgctcgtcagggg  
ggcggagcctatggaaaaacgccagcaacgcggcctttttacgggttcctggccttttctggccttttctcacatg  
ttctttcctcgttatcccctgattctgtggataaccgtattaccgcctttgagtgagctgataccgctcgcgcgag  
ccgaacgaccgagcgcagcagtgtagtgagcggagggaagcgggaagagcgcctttgagtgagctgataccgctcgcg

cagccgaacgaccgagcgcagcaggtcagtgagcgcaggaagcgggaagagcgcaccaatacgcgaaaccgcctctccccg  
cgcgttggccgattcattaatgcagctggcagcagcaggtttcccgactggaaagcgggcagtgagcgcgcaacgcgaaaa  
tgtgagttagctcactcattagccacccagggctttacactttatgcttccggctcgtatggtgtgtggaattgtga  
gcgataacaatttcacacaggaacagctatgacctgattacgccaagcgcgcaattaaccctcactaaagggaa  
caaaagctggagctgcaagcttaatgtagtcttatgcaatactctttagtcttgaacatggtaacgatgagttag  
caacatgccttacaaggagagaaaaagcaccgtgcatgcccattgggtggaagtaaggtggtagcgcgcttatt  
aggaaggcaacagacgggtctgacatggattggacgaaccactgaattgcccgcattgcagagatattgtatttaagt  
gcctagctcgatacataaacgggtctctctgggttagaccagatctgagcctgggagctctctgggtaactagggaa  
ccactgcttaagcctcaataaagcttgcccttgagtgttcaagtagtgtgtgcccgtctgttgtgtgactctggtaa  
ctagagatccctcagacccttttagtcagtggtgaaaatctctagcagtgccgcgcccgaacagggacttgaaagcgaa  
agggaaaccagaggagctctctcgacgcaggactcggcttgcgtaagcgcgcacggcaagaggcgagggggcggcgac  
tggtgagtagcgcgcaaaaatttttagctagcggaggctagaaggagagagatgggtgagagagcgtcagtaataagcgg  
gggagaattagatcgcgatgggaaaaaattcgggttaaggccagggggaaagaaaaaataaaattaaaacatatagt  
atgggcaagcagggagctagaacgattcgcagttaatcctggcctggttagaaacatcagaaggctgtagacaaatac  
tgggacagctacaaccatcccttcagacaggatcagaagaacttagatcattatataatacagtagcaaccctctat  
tgtgtgcatcaaaggatagagataaaaagacaccaaggaagctttagacaagatagaggaagagcaaaacaaaagtaa  
gaccaccgcacagcaagcggccgggtgatcttcagacctggaggaggagatagagggacaattgggagaagtgaatta  
tataaatataaagtagtaaaaattgaaccattaggagtagcaccaccaaggcaagagaagagtggtgagagaga  
aaaaagagcagtgggaaataggagctttgttccctgggttcttgggagcagcaggaagcactatgggagcagcgtcaa  
tgacgctgacggtacagggccagacaattattgtctgggtatagtgagcagcagacaattttgctgagggctattgag  
gcgcaacagcatctgttgcaactcacagctctggggcatcaagcagctccaggcaagaatcctggctgtggaagata  
cctaaaggatcaacagctcctggggatttgggggtgctctggaaaactcatttgcaccactgctgtgcttggaatg  
ctagttggagtaataaatctctggaacagatttggaatcacacgacctggatggagtgggacagagaaattaacaat  
tacacaagcttaatacactccttaattgaagaatcgcaaaaccagcaagaaaagaatgaacaagaattattggaatt  
agataaatgggcaagtttgtggaattgggttaacataacaaattggctgtggtatataaaattattcataatgatag  
taggaggcttggtaggtttaagaatagtttttctgctgactttctatagtgaaatagagtttaggcagggatattcacca  
ttatcgtttcagaccacctcccaaccccgagggggacccgacaggcccgaaggaatagaagaagaaggtggagagag  
agacagagacagatccattcgattagtgaaaggatctcgacgggtatcgatactagtattatgcccagtagatgacct  
tatgggactttcctacttggcagtagatctacgtaacggcattcgtggtgcccggagcccgcgccccgcgtccgga  
cctggaggcagccctgggtctccggatcaggccagcggccaaagggctcggcgcagcgcacctgttcccagggcctcca  
catcatggccctccctcgggttaccccacagcctaggccgattcgcacctctctccgctggggccctcgctggcgctc  
cctgcaccctgggagcgcgagcggcgcgggcggggaagcgcggcccagacccccgggtccgcccggagcagctgc  
gctgtcggggccaggccgggtctccagtggttgcgggacagacgcccaggaccgcgcttcccacgtggcggagg  
gactggggaccgggacccgctcctgccccttcacctccagctccgctcctccgcgaggaccccgcctccg  
acggtaggcgtgtacggtgggaggcctatataagcagagctagagagttgcccgtacttgacagcgcagcgttcaat  
gttgagtgtttcaagaagttcgcttgaatcaggaatactggaagacattcaaggagaatccattagactgaccac  
tgagaacgtgacgaactacatcacgaagttgaaagggcctgaagcagccgcattcttgcgagaggacctgttatac  
acctctacggcgggtcctagattgggtgctgtaatacacagaattctgattatagcgcactattatagcaccgccacca  
tggcacgaaccctgtggatactggccgtgctgctggtgggctgagaaggatctctgggtgcaatttgagaccatgatc  
atgaaactcgccaaaaggtctggcttcttctgggtactcttctatggttgttattgtggttggggcgggcatggact  
gccacaggatcctacagatcgggtgttgcctcgtgacgattgttgcacaggttcaaccaactgtaaccctaaaa  
cagctacatactcctacacagaggagaatgacgggattgtgtgtgggggtgatgatccatgcaaaaaacaggtctgc  
gaatgtgatcgagtgccagccatgtgtttccgagacaacaaagacacttacgacggcgataagatattggaactgcc  
tccctcagaagtgtcaggaagatcctgagccatgtagaccccccttccctccaccaatgaagggaaggggaagcctgc  
tgacctgcccgcagctggaggagaatcccggcccaatgatccaggtagctggtgacctctgctcgcgcactg  
ccataaccaggggagcagcatcattctggagagcggcaacgtgaacgactacgaggtggtgtacccccggaaggtgac  
ggctctgcccgaagggcgccggccagcccaagtagcaggagccatgcagtagcaggttcaaagtgaacggcgagcctg  
tggtgctgcacctggagaagaacaagggactgtttagtaaggactactccgaaactcactactccagcgcagggcg  
aaaatcacaactaacccccctgtggaggatcactgctactaccacgggaggatcgagaatgacgcccactctactgg

gtccatctctgcctgtaatggcctaaagggacacttcaagctgcagggggagatgtatctgatcgagccactgaaac  
tgagtgcagcgcgagggcccatgccatctacaagtagcagaaacgtggaaaaagaagacgagggccctaaaatgtgtggc  
gtgaccgagaccaactgggaaagctacgagcctattaaaaaggttagccagagcaacctgacccccgaacagcagag  
gttcaaccctttaagtagctggagctggtgatcgtggccgatcacaggatgttactaaatataatggggatctgg  
aaaagatcaggattaaaatctacgagatcgtgaacatcctgaacgagatgttcaggatctgtacatcaggatcgcc  
ctggtggatctcgagatctggagcaaccgcgacctgataaacgtgacctccgtggccggcgacacctcgactcatt  
cggcaattggcgagaaaccgacctgctcaaacggaaaagtacgacaacgcacagctgctgacagggcatcgattca  
acggcaccactatcggaattgcctatatagccagatgtgcaatccataacctgtccgtcggcatcgtgcaggaccac  
tccgagatcaactttctgatcgtgtgacaatggccacgaaatgggccataacctgggaatgcgccacgacaccga  
ctactgtacatgtgggggctacagctgcattatgtgcgccgtgctgtctgatcagccttctaagttttctccaact  
gctcctacattcagtagtggaagttcatcatgaaccagaactcccagtgcatctgaacgagccctgggaccgat  
atcgtgtctcctcccgtgtgtgggaacgaaattctggaagtgggggaagagtgcgattgtggctgtcctaccaattg  
ccaggatccttgctgcaacgcgccacatgtaagcagtagctcctgggtgcagtgcaagcggggagtgctgcgagc  
agtgtaggttccgggcccgtggcacagtgctgcagacgggccactgacaacgacatggacaacaggtgtacaggacag  
agcgcggattgcccttcaaatggaagaccccccttccaccaccaatgccaccaacttctccctgctcaagcaggc  
cggagacgtggaagagaacccccggaccatggtgctgattagagtgattgcaaacctgctcatcctgcagctgtcca  
acgcccagaagtccctccgagctggtgatcggcggcgatgaatgtaacatcaccgaacacagatttctggtggagatc  
ttcaactccagtgggctgttttgccggggaccctgatcgaccaggagtgggtgctgagcgcgccccactgcgacat  
gagaaatatgagaatctacctgggcgtgcacaatgagggcgtgcagcacgcagaccagcagagaaggtttgccaggg  
agaaatTTTTCTgcctgagtagcaggaactacactaaatgggacaaggacattatgctgatcagactgaatcggcca  
gtcaacaacagcgaacacatcgccccactgtccctgccagcaacctcccagcgttggctccgtctgtagaatcat  
gggctggggcacaatcacaagccccaacgctacatttccagatgtgccccactgcgccaacatcaacctgtttaatt  
acaccgtctgcagagggcgtcatgcagggctgctgccaccagcaggacctgtgtgcccggcgtgctgcaagggggg  
atcgacacttgtggcggcgaactctggcgggccccctgatctgcaatgggaccttccagggcatcgtgtcttggggggg  
ccaccctgcgccagcctggcgagcccgtctgtataccaaagtgtttgattacctgccttggatccagtcctca  
tcgctggcaacacaacagccacctgccccccggacctcttgggctggcttaa

## Ep-CA401

AAACAATTCAAGCTTTTTTCAATTCTCGACCTCGAGACAAATGGCAGTATTCATCCACAATTTTAAAGAAAAGGGG  
GGATTGGGGGGTACAGTGCAGGGGAAAGAATAGTAGACATAATAGCAACAGACATACAACTAAAGAATTACAAAA  
CAAATTACAAAAATTCAAAATTTTCGGGTTTATTACAGGGACAGCAGAGATCCAGTTTGGCCGCGGCTCGAGGGGT  
TGGGGTTGCGCCTTTTCCAAGGCAGCCCTGGGTTTGCAGGGGACGCGGCTGCTCTGGGCGTGGTTCCGGGAAACGC  
AGCGGCGCCGACCCTGGGTCTCGCACATTCTTACAGTCCGTTTCGAGCGTCAACCGGATCTTCGCGGCTACCCTTGT  
GGGCCCCCGGCGACGCTTCTGCTCCGCCCTAAGTCCGGAAGGTTCTTTCGCGTTTCGCGGCGTGCCGGACGTGAC  
AAACGGAAGCCGCACGTCTACTAGTACCCTCGCAGACGGACAGCGCCAGGGAGCAATGGCAGCGCGCCGACC  
TGGGCTGTGGCCAATAGCGGCTGCTCAGCAGGGCGCGCCGAGAGCAGCGGCCGGGAAGGGGCGGTGCGGGAGGCGGG  
GTGTGGGGCGGTAGTGTGGGCCCTGTTTCTGCCCGCGCGGTGTTCCGCATTCTGCAAGCCTCCGGAGCGCACGT  
CAGTCGGCTCCCTCGTTGACCGAATCACCGACCTCTCTCCCCAGGGGGATCCACCGGAGCTTACCATGGGATCGGCC  
ATTGAACAAGATGGATTGCACGCAGGTTCTCCGGCCGCTTGGGTGGAGAGGCTATTCGGCTATGACTGGGCACAACA  
GACAATCGGCTGCTCTGATGCCGCCGTGTTCCGGCTGTGAGCGCAGGGGCGCCCGGTTCTTTTTGTCAAGACCGACC  
TGTCCGGTGCCCTGAATGAACTGCAGGACGAGGCAGCGCGGCTATCGTGGCTGGCCACGACGGGCGTTCCTTGC  
GCTGTGCTCGACGTTGTCACTGAAGCGGGAAGGGACTGGCTGCTATTGGGCGAAGTGCCGGGGCAGGATCTCCTGTC  
ATCTCACCTTGCTCCTGCCGAGAAAGTATCCATCATGGCTGATGCAATGCGGCGGCTGCATACGCTTGATCCGGCTA  
CCTGCCATTTCGACCACCAAGCGAAACATCGCATCGAGCGAGCACGTAACCGATGGAAGCCGGTCTTGTGATCAG  
GATGATCTGGACGAAGAGCATCAGGGGCTCGCGCCAGCCGAACTGTTTCGCCAGGCTCAAGGCGCGCATGCCCGACGG  
CGATGATCTCGTCGTGACCCATGGCGATGCCTGCTTGCCGAATATCATGGTGGAAAATGGCCGCTTTTCTGGATTCA  
TCGACTGTGGCCGGCTGGGTGTGGCGGACCCTATCAGGACATAGCGTTGGCTACCCGTGATATTGCTGAAGAGCTT

GGCGGCGAATGGGCTGACCGCTTCTCGTGCTTTACGGTATCGCCGCTCCCGATTTCGCAGCGCATCGCCTTCTATCG  
CCTTCTTGACGAGTTCTTCTGACGCCCCGCCACGACCCGAGCGCCCCGACCGAAAGGAGCGCACGACCCCATGCAT  
CGTTAAGAGCTCGGTACCTTTAAGACCAATGACTTACAAGGCAGCTGTAGATCTTAGCCACTTTTTAAAGAAAAGG  
GGGACTGGAAGGGCTAATCACTCCCAACGAAGACAAGATCTGCTTTTTGCTTGTACTGGGTCTCTGTTAGAC  
CAGATCTGAGCCTGGGAGCTCTCTGGCTAACTAGGGAACCCACTGCTTAAGCCTCAATAAAGCTTGCCTTGAGTGCT  
TCAAGTAGTGTGTGCCGTCTGTTGTGTGACTCTGGTAACTAGAGATCCCTCAGACCCTTTTAGTCAGTGTGGAAAA  
TCTCTAGCAGTAGTAGTTCATGTATCTTATTATTAGTATTTATAACTTGCAAAGAAATGAATATCAGAGAGTGAG  
AGGAACTTGTTTTATTGACGCTTATAATGGTTACAAATAAAGCAATAGCATCACAAATTTACAAATAAAGCATT  
TTCACTGCATTCTAGTTGTGGTTTTGTCCAAACTCATCAATGTATCTTATCATGTCTGGCTCTAGCTATCCCGCCCT  
AACTCCGCCCATCCCGCCCTAACTCCGCCAGTTCCGCCATTCTCCGCCCATGGCTGACTAATTTTTTTTTATTT  
ATGCAGAGGCCGAGGCCGCTCGGCCTCTGAGCTATTCCAGAAGTAGTGAGGAGGCTTTTTTGAGGCCTAGGGACG  
TACCCAATTCCGCCATAGTGAGTCGTATTACGCGCGCTCACTGGCCGTCGTTTTACAACGTCGTGACTGGGAAAC  
CCTGGCGTTACCCAACCTAATCGCCTTGACGACATCCCCCTTCGCCAGCTGGCGTAATAGCGAAGAGGCCCGCAC  
CGATCGCCCTTCCCAACAGTTGCGCAGCCTGAATGGCGAATGGGACGCGCCCTGTAGCGGCGCATTAAGCGCGGCGG  
GTGTGGTGGTTACGCGCAGCGTGACCGCTACACTTGCCAGCGCCCTAGCGCCGCTCCTTTTCGTTTTCTTCCCTTC  
TTTTCTCGCACGTTTCGCCGCTTTCCCGTCAAGCTCTAAATCGGGGGCTCCCTTTAGGGTTCCGATTTAGTGCTTT  
ACGGCACCTCGACCCCAAAAACTTGATTAGGGTGATGGTTCACGTAGTGGGCCATCGCCCTGATAGACGGTTTTTC  
GCCCTTTGACGTTGGAGTCCACGTTCTTTAATAGTGGACTCTTGTTCCAAACCTGGAACAACACTCAACCCTATCTCG  
GTCTATTCTTTTGATTTATAAGGGATTTTGCCGATTTCCGCCCTATTGGTTAAAAAATGAGCTGATTTAACAAAAAT  
TAACGCGAATTTAACAAAAATTAACGCTTACAATTTAGGTGGCACTTTTCGGGGAAATGTGCGCGGAACCCCTAT  
TTGTTTTATTTTTCTAAATACATTCAAATATGTATCCGCTCATGAGACAATAACCCTGATAAATGCTTCAATAATATT  
GAAAAAGGAAGAGTATGAGTATTCAACATTTCCGTGTCGCCCTTATTCCCTTTTTTGCGGCATTTTGCCTTCTGTT  
TTTGCTCACCCAGAAACGCTGGTGAAAGTAAAAGATGCTGAAGATCAGTTGGGTGCACGAGTGGGTTACATCGAACT  
GGATCTCAACAGCGGTAAGATCCTTGAGAGTTTTTCGCCCGAAGAACGTTTTTCCAATGATGAGCACTTTTAAAGTTC  
TGCTATGTGGCGCGGTATTATCCCGTATTGACGCCGGGCAAGAGCAACTCGGTGCGCCGATACACTATTCTCAGAAT  
GACTTGGTTGAGTACTCACCAGTCACAGAAAAGCATCTTACGGATGGCATGACAGTAAGAGAATTATGCAGTGCTGC  
CATAACCATGAGTGATAAACACTGCGGCCAACTTACTTCTGACAACGATCGGAGGACCGAAGGAGCTAACCGCTTTTT  
TGCACAACATGGGGGATCATGTAACCTCGCCTTGATCGTTGGGAACCGGAGCTGAATGAAGCCATACCAAACGACGAG  
CGTGACACCACGATGCCTGTAGCAATGGCAACAACGTTGCGCAAACCTATTAACCTGGCGAACTACTTACTCTAGCTTC  
CCGGCAACAATTAATAGACTGGATGGAGGCGGATAAAGTTGCAGGACCACTTCTGCGCTCGGCCCTTCCGGCTGGCT  
GGTTTTATTGCTGATAAATCTGGAGCCGGTGAGCGTGGGTCTCGCGGTATCATTGCAGCACTGGGGCCAGATGGTAAG  
CCCTCCCGTATCGTAGTTATCTACACGACGGGGAGTCAGGCAACTATGGATGAACGAAATAGACAGATCGCTGAGAT  
AGGTGCCTCACTGATTAAGCATTGGTAACTGTCAGACCAAGTTTACTCATATATACTTTAGATTGATTTAAAACCTC  
ATTTTTAATTTAAAAGGATCTAGGTGAAGATCCTTTTTGATAATCTCATGACCAAATCCCTAACGTGAGTTTTTCG  
TTCCACTGAGCGTCAGACCCCGTAGAAAAGATCAAAGGATCTTCTTGAGATCCTTTTTTTCTGCGCGTAATCTGCTG  
CTTGCAAACAAAAAACACCGCTACCAGCGGTGGTTTTGTTTGCCGGATCAAGAGCTACCAACTCTTTTTCCGAAGG  
TAACTGGCTTCAGCAGAGCGCAGATACCAAATACTGTTCTTCTAGTGTAGCCGTAGTTAGGCCACCACTTCAAGAAC  
TCTGTAGCACCGCTACATACTCGCTCTGCTAATCCTGTTACCAGTGGCTGCTGCCAGTGGCGATAAGTCGTGTCT  
TACCGGGTTGGACTCAAGACGATAGTTACCGGATAAGGCGCAGCGGTCCGGCTGAACGGGGGGTTTCGTGCACACAGC  
CCAGCTTGAGCGAACGACCTACACCGAACTGAGATACCTACAGCGTGAGCTATGAGAAAGCGCCACGCTTCCCGAA  
GGGAGAAAGGCGGACAGGTATCCGGTAAGCGGCAGGGTCCGAAACAGGAGAGCGCACGAGGGGAGCTTCCAGGGGAAA  
CGCCTGGTATCTTTATAGTCCTGTCCGGTTTTCCGCACCTCTGACTTGAGCGTCGATTTTTGTGATGCTCGTCAGGGG  
GGCGGAGCCTATGGAAAACGCCAGCAACGCGGCCTTTTTACGGTTCCTGGCCTTTTGCTGGCCTTTTGCTCACATG  
TTCTTTCTGCGTTATCCCTGATTCTGTGGATAACCGTATTACCGCCTTTGAGTGAGCTGATACCGCTCGCCGAG  
CCGAACGACCGAGCGCAGCGAGTCAGTGAGCGAGGAAGCGGAAGAGCGCCCTTTGAGTGAGCTGATACCGCTCGCCG  
CAGCCGAACGACCGAGCGCAGCGAGTCAGTGAGCGAGGAAGCGGAAGAGCGCCCAATACGCAAACCGCCTCTCCCGG  
CGCGTTGGCCGATTCAATTAATGCAGCTGGCACGACAGGTTTTCCGACTGGAAAGCGGGCAGTGAGCGCAACGCAAAA  
TGTGAGTTAGCTCACTCATTAGGCACCCAGGCTTTACACTTTATGCTTCCGGCTCGTATGTTGTGTGGAATTGTGA  
GCGGATAACAATTTACACAGGAAACAGCTATGACCATGATTACGCCAAGCGCGCAATTAACCCTCACTAAAGGGAA

CAAAAGCTGGAGCTGCAAGCTTAATGTAGTCTTATGCAATACTCTTGTAGTCTTGTCAACATGGTAACGATGAGTTAG  
CAACATGCCTTACAAGGAGAGAAAAAGCACCGTGCATGCCGATTGGTGGAAGTAAGGTGGTACGATCGTGCCTTATT  
AGGAAGGCAACAGACGGGTCTGACATGGATTGGACGAACCACTGAATTGCCGCATTGCAGAGATATTGTATTTAAGT  
GCCTAGCTCGATACATAAACGGGTCTCTCTGGTTAGACCAGATCTGAGCCTGGGAGCTCTCTGGCTAACTAGGGAAC  
CCACTGCTTAAGCCTCAATAAAGCTTGCCTTGAGTGCTTCAAGTAGTGTGTGCCCGTCTGTTGTGTGACTCTGGTAA  
CTAGAGATCCCTCAGACCCTTTTAGTCAGTGTGGAAAATCTCTAGCAGTGGCGCCCGAACAGGGACTTGAAAGCGAA  
AGGGAAACCAGAGGAGCTCTCTCGACGCAGGACTCGGCTTGCTGAAGCGCGCACGGCAAGAGGCGAGGGGCGGCGAC  
TGGTGAGTACGCCAAAAATTTTACTAGCGGAGGCTAGAAGGAGAGAGATGGGTGCGAGAGCGTCAGTATTAAGCGG  
GGGAGAATTAGATCGCGATGGGAAAAAATTCGGTTAAGGCCAGGGGGAAAGAAAAAATATAAATTTAAACATATAGT  
ATGGGCAAGCAGGGAGCTAGAACGATTTCGCAGTTAATCCTGGCCTGTTAGAAACATCAGAAGGCTGTAGACAAATAC  
TGGGACAGCTACAACCATCCCTTCAGACAGGATCAGAAGAACTTAGATCATTATATAATACAGTAGCAACCCTCTAT  
TGTGTGCATCAAAGGATAGAGATAAAAAGACACCAAGGAAGCTTTAGACAAGATAGAGGAAGAGCAAAAACAAAAGTAA  
GACCACCGCACAGCAAGCGGCCGGTGATCTTCAGACCTGGAGGAGGAGATATGAGGGACAATTGGAGAAGTGAATTA  
TATAAATATAAAGTAGTAAAAATTGAACCATTAGGAGTAGCACCCACCAAGGCAAAGAGAAGAGTGGTGCAGAGAGA  
AAAAAGAGCAGTGGGAATAGGAGCTTTGTTCTTGGGTTCTTGGGAGCAGCAGGAAGCACTATGGGCGCAGCGTCAA  
TGACGCTGACGGTACAGGCCAGACAATTATTGTCTGGTATAGTGCAGCAGCAGAACAATTTGCTGAGGGCTATTGAG  
GCGCAACAGCATCTGTTGCAACTCACAGTCTGGGGCATCAAGCAGCTCCAGGCAAGAATCCTGGCTGTGGAAAGATA  
CCTAAAGGATCAACAGCTCCTGGGGATTTGGGGTTGCTCTGGAAAACCTCATTTGCACCACTGCTGTGCCTTGGAAATG  
CTAGTTGGAGTAATAAATCTCTGGAACAGATTTGGAATCACACGACCTGGATGGAGTGGGACAGAGAAATTAACAAT  
TACACAAGCTTAATACACTCCTTAATTGAAGAATCGCAAACCAGCAAGAAAAGAATGAACAAGAATTATTGGAATT  
AGATAAATGGGCAAGTTTGTGGAATTGGTTAACATAACAAATTGGCTGTGGTATATAAAAATTATTATAATGATAG  
TAGGAGGCTTGGTAGGTTTAAAGAATAGTTTTTGTGTACTTTCTATAGTGAATAGAGTTAGGCAGGGATATTCACCA  
TTATCGTTTCAGACCCACCTCCCAACCCCGAGGGGACCCGACAGGCCCGAAGGAATAGAAGAAGAAGGTGGAGAGAG  
AGACAGAGACAGATCCATTTCGATTAGTGAACGGATCTCGACGGTATCGATACTAGTATTATGCCAGTACATGACCT  
TATGGGACTTTTCTACTTGGCAGTACATCTACGTAAcGcgctcgccattcggtggtgcccggagcccgcgccccgcgt  
ccggacctggaggcagccctgggtctccggatcaggccagcggccaaagggctcgccgcacgcacctgtcccagggc  
ctccacatcatggccccctccctcggttaccacacagcctaggccgattcgacctctctccgctggggccccctcgctg  
gcgtccctgcacctgggagcgcgagcggcgcgcgggggaagcgcggcccagacccccgggtccgccccggagca  
gctgcgctgtcggggccaggccgggtcccagtggttcgcgggcacagacgcccaggaccgcgctcccacgtggc  
ggagggactggggacccgggaccccgctcctgccccctcacctccagctccgcctcctccgcgaggacccccgccccg  
tccccgacggtaggcgtgtacggtgggaggcctatataagcagagctGCCACCATGGCTTCTTTGCTCAATTTTGCTA  
ACCTTATAGAGTGTGCTAATCATGGCACGCGCTCAGCACTCGCATACTGACTATGGATGTTATTGTGGTAAGGGA  
GGAAGAGGAACCCCTCTCGACGACCTGGACCGCTGCTGCCATGTTTCATGATGACTGCTATGGAGAGGCCGAGAAGCT  
CCCCGCCTGTAATTATCTTATGTCTAGCCCTTACTTCAACTCCTATTCTTACAAGTGAACGAAGGCAAAGTAACGT  
GTACTGACGATAACGACGAGTGTAAAGCCTTTATATGTAACCTGTGACCGAACGGCCGCGATATGTTTTGCTGGCGCG  
ACTTACAACGATGAGAACTTTATGATTAGCAAGAAATATAACGACATCTGCCAGAGACCCCCCTTCTCCACCCCC  
CAACGGCAGCGGGCCGCTGGGACTGTGGGCTGGCTCTGGCGGCGGCGGGAGCGGCGGCGGGTCTGGCGGCG  
GGGGCAGCgaaggaaggggaagcctgctgacctgcggcgacgtggaggagaatcccggcccaatgatccaggtactg  
ctggtgacctctgcctcgccgcaactgccataaccaggggagcagcatcattctggagagcggcaacgtgaacgacta  
cgaggtggtgtacccccggaaggtgacggctctgcccaggggcgccggccagcccaagtagcaggacgcatgacgt  
acgagttcaaagtgaacggcgagcctgtggtgctgcacctggagaagaacaagggactgtttagtaaggactactcc  
gaaactcactactccagcgacggggcgaaaatcacaactaaccctctggtggaggatcactgctactaccacgggag  
gatcgagaatgacgcccactctactgggtccatctctgcctgtaatggcctaaagggacacttcaagctgcaggggg  
agatgtatctgatcgagccactgaaactgagtgcagcggagcccatgccatctacaagtagcagaacgtggaaaaa  
gaagacgagggccccataaatgtgtggcgtagccgagaccaactgggaaagctacgagcctattaaaaaggctagcca  
gagcaacctgacccccgaacagcagaggttcaaccctttaagtagctggagctggtgatcggtggccgatcacagga  
tgttcactaaatataatggggatctggaaaagatcaggattaaaatctacgagatcgtgaacatcctgaacgagatg  
ttcaggtatctgtacatcaggatcgccctgggtgatctcgagatctggagcaaccgacgacctgataaacgtgacctc  
cgtggccggcgacacctcgactcattcggcaattggcgagaaaccgacctgctcaaacggaaaagtacgacaacg

cacagctgctgacagggcatcgatttcaacggcaccactatcggaattgcctatatagccagtatgtgcaatccatac  
ctgtccgtcggcatcggtgcaggaccactccgagatcaactttctgatcgctgtgacaatggcccacgaaatgggcca  
taacctgggaatgcgccacgacaccgactactgtacatgtgggggtacagctgcattatgtgcccgtgctgtctg  
atcagccttctaagtttttctccaactgctcctacattcagtatggcaagtccatcatgaaccagaactcccagtgc  
attctgaacgagcccctgggcaccgatatcggtgtctcctcccgtgtgtgggaacgaaattctggaagtgggggaaga  
gtgctgattgtggctgtcctaccaattgccaggatccttgtgcaacgccgccacatgtaagcagtactcctgggtgc  
agtgcgaaagcggggagtgctgagcagtgtaggttccgggcccgtggcacagtggtgcagacggggcactgacaac  
gacatggacaacaggtgtacaggacagagcgcgattgcccttcaaattggaggacctcttgggctggcttaaGTTTA  
AACGGCCGC
